# Supplementary material
Source: PubMed Central journal article supplement (PMC4292468)
Supplement: AEM.02925-14_zam999105977so1.pdf [file AEM.02925-14_zam999105977so1.pdf]

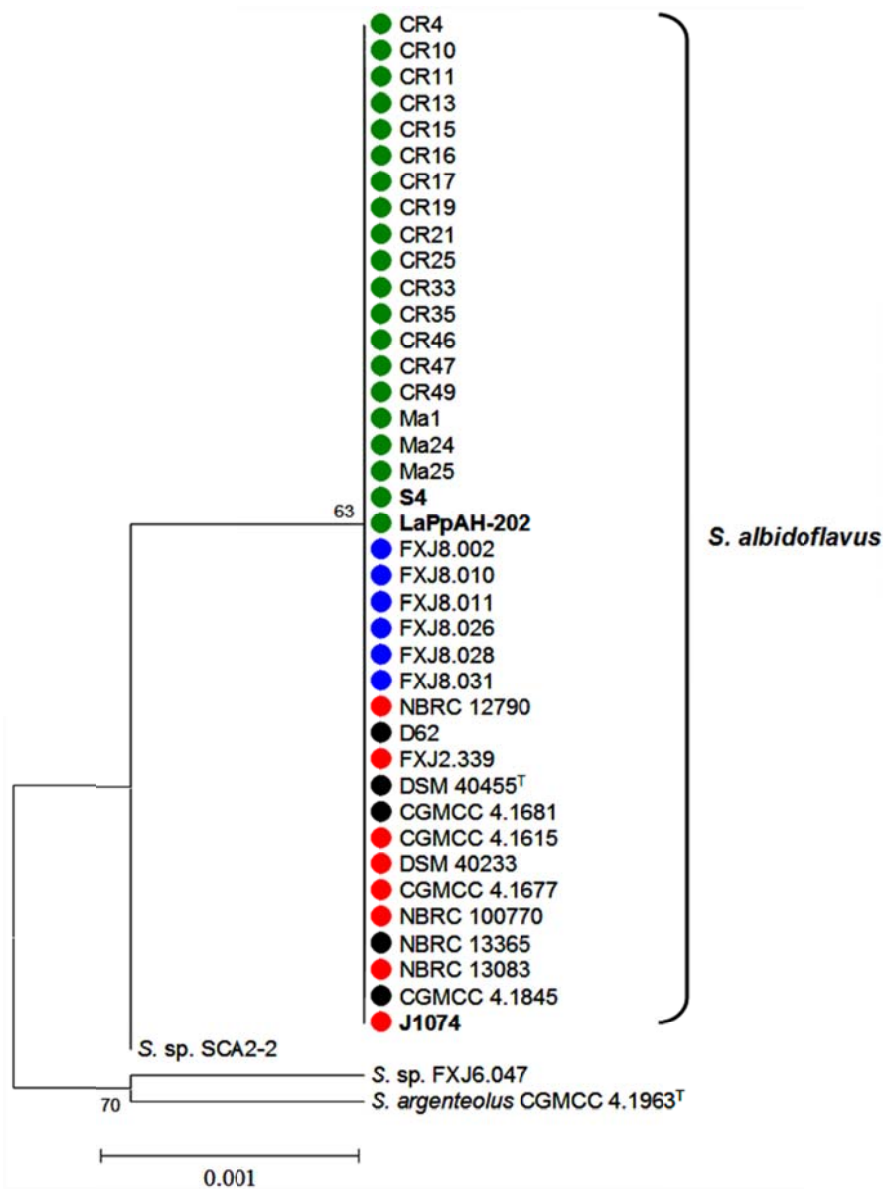

**FIG S1** Phylogenetic NJ tree of *S. albidoflavus* strains based on the 16S rRNA gene sequences. Only bootstrap support values above 50% are shown. The bar indicates 0.1% estimated sequence divergence. Discs in green, blue, red and black represent insects, sea, soil and other sources, respectively. The genome strains are shown in bold, and SM8 and CNY228 are not included in this phylogeny for their 16S rRNA gene sequences are unavailable in public databases.

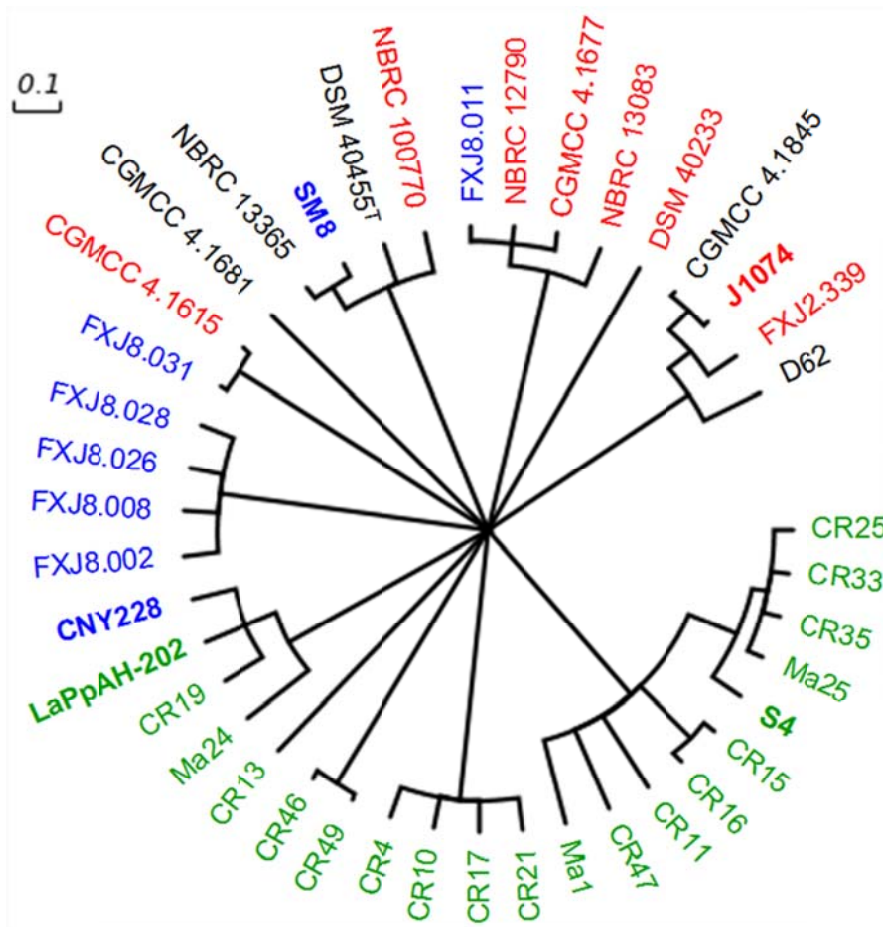

**FIG S2** Clonal genealogy inferred by ClonalFrame. Strains from insects, sea, soil and other sources are in green, blue, red and black, respectively. The bar indicates 10% estimated sequence divergence.

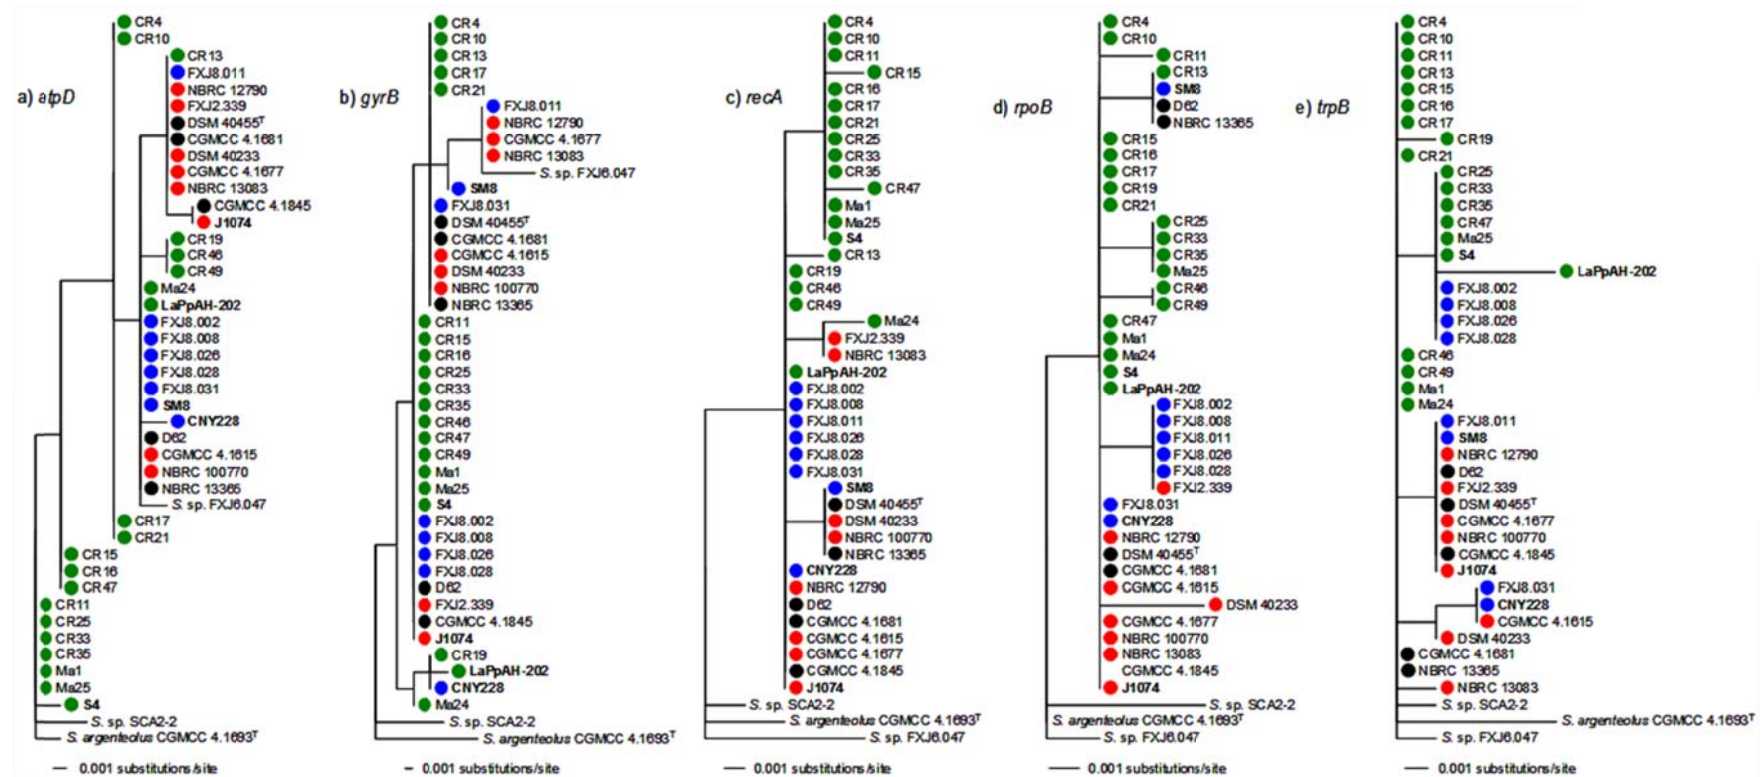

**FIG S3** ML phylogenies of *atpD*, *gyrB*, *recA*, *rpoB* and *trpB* (a-e) based upon 41 strains of *S. albidoflavus*. Discs in green, blue, red and black represent insects, sea, soil and other sources, respectively. The bars indicate 0.1% estimated sequence divergence in respective phylogenies.

**TABLE S1** Strains used in this study and GenBank accession numbers of alleles of loci

| Strain                 | 16S rRNA | <i>atpD</i>  | <i>gyrB</i>  | <i>recA</i>  | <i>rpoB</i>  | <i>trpB</i>  |
|------------------------|----------|--------------|--------------|--------------|--------------|--------------|
| CGMCC 4.1615           | DQ026642 | FJ406408     | FJ406419     | FJ406430     | FJ406441     | FJ406452     |
| CGMCC 4.1677           | AB184129 | FJ406410     | FJ406421     | FJ406432     | FJ406443     | FJ406454     |
| CGMCC 4.1681           | Z76684   | FJ406407     | FJ406418     | FJ406429     | FJ406440     | FJ406451     |
| CGMCC 4.1845           | AY999871 | EF031314     | EF055001     | EF055056     | EF055111     | EF055166     |
| CNY228                 | -        | ARIN01000050 | ARIN01000043 | ARIN01000026 | ARIN01000049 | ARIN01000040 |
| CR10                   | KM189917 | KM189938     | KM189965     | KM189992     | KM190019     | KM190046     |
| CR11                   | KM189918 | KM189939     | KM189966     | KM189993     | KM190020     | KM190047     |
| CR13                   | KM189919 | KM189940     | KM189967     | KM189994     | KM190021     | KM190048     |
| CR15                   | KM189920 | KM189941     | KM189968     | KM189995     | KM190022     | KM190049     |
| CR16                   | KM189921 | KM189942     | KM189969     | KM189996     | KM190023     | KM190050     |
| CR17                   | KM189922 | KM189943     | KM189970     | KM189997     | KM190024     | KM190051     |
| CR19                   | KM189923 | KM189944     | KM189971     | KM189998     | KM190025     | KM190052     |
| CR21                   | KM189924 | KM189945     | KM189972     | KM189999     | KM190026     | KM190053     |
| CR25                   | KM189925 | KM189946     | KM189973     | KM190000     | KM190027     | KM190054     |
| CR33                   | KM189926 | KM189947     | KM189974     | KM190001     | KM190028     | KM190055     |
| CR35                   | KM189927 | KM189948     | KM189975     | KM190002     | KM190029     | KM190056     |
| CR4                    | KM189916 | KM189937     | KM189964     | KM189991     | KM190018     | KM190045     |
| CR46                   | KM189928 | KM189949     | KM189976     | KM190003     | KM190030     | KM190057     |
| CR47                   | KM189929 | KM189950     | KM189977     | KM190004     | KM190031     | KM190058     |
| CR49                   | KM189930 | KM189951     | KM189978     | KM190005     | KM190032     | KM190059     |
| D62                    | KM189935 | KM189962     | KM189989     | KM190016     | KM190043     | KM190070     |
| DSM 40233              | Z76678   | FJ406415     | FJ406426     | FJ406437     | FJ406448     | FJ406459     |
| DSM 40455 <sup>T</sup> | Z76676   | FJ406416     | FJ406427     | FJ406438     | FJ406449     | FJ406460     |
| FXJ2.339               | KM189934 | KM189961     | KM189988     | KM190015     | KM190042     | KM190069     |
| FXJ8.002               | HQ622469 | KM189955     | KM189982     | KM190009     | KM190036     | KM190063     |
| FXJ8.008               | HQ622474 | KM189956     | KM189983     | KM190010     | KM190037     | KM190064     |
| FXJ8.011               | HQ622477 | KM189957     | KM189984     | KM190011     | KM190038     | KM190065     |
| FXJ8.026               | HQ622487 | KM189958     | KM189985     | KM190012     | KM190039     | KM190066     |

|                                                    |                     |                      |                      |                      |                      |                      |
|----------------------------------------------------|---------------------|----------------------|----------------------|----------------------|----------------------|----------------------|
| FXJ8.028                                           | HQ622488            | KM189959             | KM189986             | KM190013             | KM190040             | KM190067             |
| FXJ8.031                                           | HQ622489            | KM189960             | KM189987             | KM190014             | KM190041             | KM190068             |
| J1074                                              | Gene ID:<br>5144945 | Gene ID:<br>15145285 | Gene ID:<br>15146834 | Gene ID:<br>15144914 | Gene ID:<br>15147536 | Gene ID:<br>15148665 |
| LaPpAH-202                                         | ARDM01000035        | ARDM01000005         | ARDM01000003         | ARDM01000014         | ARDM01000001         | ARDM01000004         |
| Ma1                                                | KM189931            | KM189952             | KM189979             | KM190006             | KM190033             | KM190060             |
| Ma24                                               | KM189932            | KM189953             | KM189980             | KM190007             | KM190034             | KM190061             |
| Ma25                                               | KM189933            | KM189954             | KM189981             | KM190008             | KM190035             | KM190062             |
| NBRC 100770                                        | AB249937            | FJ406411             | FJ406422             | FJ406433             | FJ406444             | FJ406455             |
| NBRC 12790                                         | AB184147            | FJ406412             | FJ406423             | FJ406434             | FJ406445             | FJ406456             |
| NBRC 13083                                         | AB184299            | FJ406414             | FJ406425             | FJ406436             | FJ406447             | FJ406458             |
| NBRC 13365                                         | AB184355            | FJ406413             | FJ406424             | FJ406435             | FJ406446             | FJ406457             |
| S4                                                 | CADY01000206        | CADY01000160         | CADY01000191         | CADY01000147         | CADY01000075         | CADY01000035         |
| SM8                                                | -                   | AMPN01000168         | AMPN01000124         | AMPN01000014         | AMPN01000123         | AMPN01000292         |
| <i>S. argenteolus</i><br>CGMCC 4.1693 <sup>T</sup> | EU048540            | EF031302             | EF054989             | EF055044             | EF055099             | EF055154             |
| <i>S. sp.</i> FXJ6.047                             | GU002076            | JQ258968             | JQ258989             | JQ258947             | JQ259010             | JQ259031             |
| <i>S. sp.</i> SCA2-2                               | KM189936            | KM189963             | KM189990             | KM190017             | KM190044             | KM190071             |

- Sequences unavailable in public databases.

**TABLE S2** Values of  $I_A^S$  and recombination rates in the Structure-defined populations when  $K = 5$ 

| Population<br>color in Fig. 2 | No. of<br>strains | $I_A^S$                | Recombination rate <sup>a</sup> |                 |
|-------------------------------|-------------------|------------------------|---------------------------------|-----------------|
|                               |                   |                        | $\rho/\theta$                   | $r/m$           |
| Blue                          | 4                 | -                      | -                               | -               |
| Green                         | 10                | 0.1785 ( $P < 0.01$ )  | $0.02 \pm 0.004$                | $1.12 \pm 0.09$ |
| Purple                        | 4                 | -                      | -                               | -               |
| Red                           | 17                | 0.0153 ( $P = 0.360$ ) | $8.71 \pm 1.11$                 | $1.74 \pm 0.22$ |
| Yellow                        | 6                 | 0.1470 ( $P = 0.060$ ) | $0.01 \pm 0.002$                | $0.42 \pm 0.04$ |

<sup>a</sup> The mean values of five independent runs of ClonalFrame are shown as average  $\pm$  standard error of the mean.

- Values unavailable for a lack of polymorphic sites in populations.
